# Supplementary material
Source: ML conference proceedings conference paper supplement (https://openreview.net/forum?id=xcWifOV1VX)
Supplement: supplementary_material [file attachment]

# $S^2$ -CSNet: Scale-Aware Scalable Sampling Network for Image Compressive Sensing

## 1 Visual Comparisons

In this section, we compare the reconstruction quality of the proposed  $S^2$ -CSNet and other network-based image CS. Fig. 1 gives a comparison of images recovered by different CS algorithms on the Set5 [1] dataset. Overall, the visual comparisons in Fig. 1 show that our  $S^2$ -CSNet is able to recover high-quality results with more details and sharper edges.

## References

- [1] Marco Bevilacqua, Aline Roumy, Christine Guillemot, and Marie-Line Alberi Morel. 2012. Low-Complexity Single-Image Super-Resolution based on Nonnegative Neighbor Embedding. In *British Machine Vision Conference (BMVC)*. 135.1–135.10.

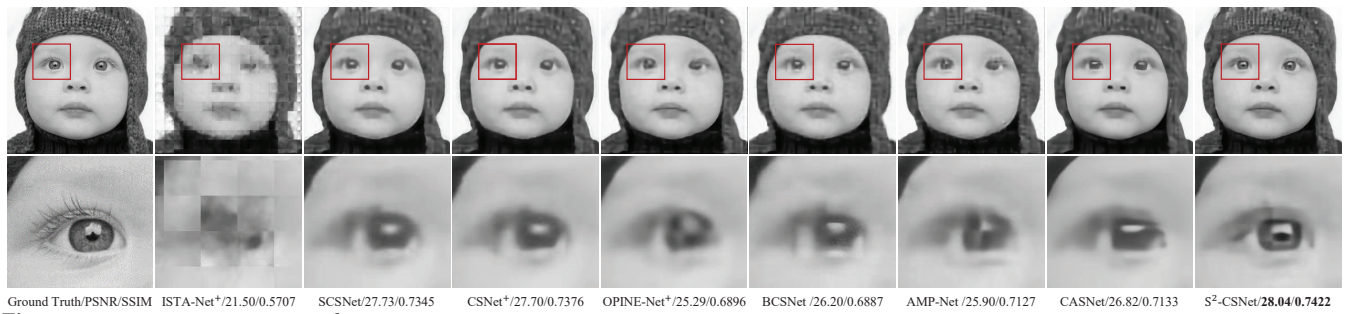

**Figure 1:** Visual comparisons of our S<sup>2</sup>-CSNet and other representative image CS networks on recovering an image from Set5 [1] in the case of CS ratio  $R = 0.01$ .
